# Supplementary material for: Ultra-high-entropy alloy nanoparticles: beyond five components
Source: Royal Society of Chemistry journal article supplement (doi:10.1039/d5qi00884k), 2025-01-01
Supplement: d5qi00884k1.zip [file d5qi00884k1.zip]

## Sheet: table
		Title	Alloy(s)	Exact Composition	Elements	ΔH (Takeuchi)	ΔH (Troparesvsky)	ΔS (J/Kmol)	Method type	T reaction (°C)	Reaction time	Heating rate (K/s)	Cooling rate (K/s)	ΔG @ RT (Takeuchi)	ΔG @ reaction (Takeuchi)	ΔG @ RT (Troparevsky)	ΔG @ react (Troparevsky)	delta parameter (%)	Size (nm)	Standard deviation (nm)	Dispersity (%}	Phase	Year	Reference
		Platinum-Group-Metal High-Entropy-Alloy Nanoparticles	RuRhPdOsIrPt	Yes	6	2.5532	0.17	14.8967	2	230	1h	N/A	N/A	-1.81377	-4.94207	-4.19697	-7.32528	0.013	3.1	0.6	0.19	fcc	2020	48
		Noble-Metal High-Entropy-Alloy Nanoparticles: Atomic-Level Insight into the Electronic Structure	RuRhPdAgOsIrPtAu	Yes	8	9.0611	6.5224	17.2497	2	230	1h	N/A	N/A	4.00435	0.38191	1.46565	-2.15679	0.0284	4.1	1.2	0.29	fcc	2022	16
		Liquid metal for high-entropy alloy nanoparticles synthesis	GaCaCuPdCoNiAlMnRu	Yes	9	-15.0881	N/A	17.9487	3	650	6h	22	N/A	-20.3498	-31.6574	N/A	N/A	0.0854	10-50 nm	N/A	N/A	bcc	2023	63
			GaCuPdNiMnAlInRhPtCoMg	Yes	11	-21.1308	N/A	19.2083	3		6h	22	N/A	-26.7617	-26.3775	N/A	N/A	0.0845	10-50 nm	N/A	N/A	fcc
			CoCuGaMnNiRhFeRu	Yes	8	-6.6917	N/A	17.1719	3		6h	22	N/A	-11.7256	-11.3822	N/A	N/A	0.0431	10-50 nm	N/A	N/A	bcc
			GaFeNiCuZnScVMnMgZrPtRhRuIrHfMoNb	No	17	-27.8581	N/A	23.5553	3		6h	22	N/A	-34.7633	-34.2922	N/A	N/A	0.0875	10-50 nm	N/A	N/A	N/A
		Synthesis of High-Entropy-Alloy Nanoparticles by a Step-Alloying Strategy as a Superior Multifunctional Electrocatalyst	PtZrNbFeCuTaMoHfBiWZnSnPdNi	Yes	14	-39.2499	N/A	19.7303	3	700	3 h	N/A	N/A	-45.0338	-58.4504	N/A	N/A	0.0808	5 nm	N/A	N/A	fcc	2023	29
			PtFeCoNiCrMnGaSnAlHfBiMoZn	Yes	13	-17.0328	N/A	18.0551	3		3 h	N/A	N/A	-22.3257	-21.9646	N/A	N/A	0.0766	5 nm	N/A	N/A	fcc
			PtPdSnCuZnZrHfNiRuWAuBi	Yes	12	-37.17	N/A	18.4959	3		3 h	N/A	N/A	-42.5921	-42.2222	N/A	N/A	0.0771	5 nm	N/A	N/A	fcc
			PtAuPdFeSnInCuGaMnAlNi	Yes	11	-11.1088	N/A	18.1795	3		3 h	N/A	N/A	-16.4381	-16.0745	N/A	N/A	0.0923	5 nm	N/A	N/A	fcc
		Nanoporous ultra-high-entropy alloys containing fourteen elements for water splitting electrocatalysis	AlAgAuCoCuFeIrMoNiPdPtRhRuTi	Yes	14	-20.5536	-49.2895	21.0142	5	20	3 h	N/A	N/A	-26.7139	-26.7139	-55.4498	-55.4498	0.0512	N/A	N/A	N/A	fcc, low crystallinity	2021	74
			AlAgAuCoCuFeIrMoNiPdPtRhRu	Yes	13	-13.7202	-42.0798	20.4951	5		3 h	N/A	N/A	-19.7283	-19.3184	-48.0879	-47.678	0.0504	N/A	N/A	N/A	fcc, low crystallinity
			AlAgAuCoCuFeIrNiPdPtRhRu	Yes	12	-14.1512	-43.9585	19.8343	5		3 h	N/A	N/A	-19.9656	-19.5689	-49.7729	-49.3762	0.0518	N/A	N/A	N/A	fcc, low crystallinity
		Continuous-Flow Chemical Synthesis for Sub-2 nm Ultra-Multielement Alloy Nanoparticles Consisting of Group IV to XV Elements	BiCoCuFeGaInIrNiPdPtRhRuSbSnTi	Yes	15	-6.6696	N/A	21.3798	2	66	5 min	N/A	N/A	-12.9371	-13.9206	N/A	N/A	0.1064	1.9	0.6	0.32	amorphous	2023	60
			BiCoCuFeGaInNiSbSnTi	No	10	-2.16	N/A	19.1437	2	66	5 min	N/A	N/A	-7.77198	-8.65259	N/A	N/A	0.1214	5.9	1.5	0.25	amorphous
		Carbothermal Shock Synthesis of High-Entropy-Alloy Nanoparticles	PtPdCoNiFeCuAuSn	Yes	8	-3.1516	N/A	16.7126	1	1700	55 ms	30000	100000	-8.0509	-36.1281	N/A	N/A	0.0594	5-10 nm	N/A	N/A	fcc, low crystallinity	2018	36
			PtPdCoNiFeCuAu	Yes	7	1.0193	-4.1563	16.1774	1	1700	55 ms	30000	100000	-3.7231	-30.9011	-8.8987	-36.0767	0.0575	5-10 nm	N/A	N/A	N/A
			PtCoNiFeCuAu	Yes	6	-2.5181	-8.7139	14.2492	1	1700	55 ms	30000	100000	-6.69525	-30.6339	-12.8911	-36.8297	0.0568	5-10 nm	N/A	N/A	N/A
		Synthesis of High-Entropy Alloy Nanoparticles on Supports by the Fast Moving Bed Pyrolysis.	MnCoNiCuRhPdSnIrPtAu	Yes	10	-7.6684	N/A	19.1286	1	650	2 h	130	N/A	-13.2759	-25.327	N/A	N/A	0.0677	2 nm	N/A	N/A	fcc, low crystallinity	2020	41
			NiCuPdSnAuPt	No	6	-9.8804	N/A	14.8966	1	650	2 h	130	N/A	-14.2473	-23.6322	N/A	N/A	0.0721	N/A	N/A	N/A	fcc, low crystallinity
			CoNiCuPdSnPtAu	No	7	-6.7785	N/A	16.1774	1	650	2 h	130	N/A	-11.5209	-21.7127	N/A	N/A	0.0755	N/A	N/A	N/A	fcc, low crystallinity
			NiCuPdSnIrPtAu	No	7	-6.1935	N/A	16.1774	1	650	2 h	130	N/A	-10.9359	-21.1277	N/A	N/A	0.067	N/A	N/A	N/A	fcc, low crystallinity
			CoNiCuPdSnIrPtAu	Yes	8	-4.6875	N/A	17.2885	1	650	2 h	130	N/A	-9.75562	-20.6474	N/A	N/A	0.0708	N/A	N/A	N/A	fcc, low crystallinity
		Continuous 2000 K Droplet-to-Particle Synthesis.	AuCoCuIrPtMnMoNiPdRu	Yes	10	-5.68	-7.6652	19.1437	1	1700	16 ms	100000	100000	-11.292	-43.4534	-13.2772	-45.4386	0.0497	160	5	0.03	fcc	2020	42
		Unconventional Alloys Confined in Nanoparticles: Building Blocks for New Matter	NiCrCoMoAuAg	No	6	9.5085	7.2007	14.8964	1	N/A	1 µs	100000000	100000000	5.14162	N/A	2.83382	N/A	0.0646	N/A	N/A	N/A	fcc, low crystallinity	2020	21
			NiCrCoMoCuPd		6	-2.9519	-2.55	14.8964	1					-7.31878	N/A	-6.62135	N/A	0.0463	N/A	N/A	N/A
		General synthesis of high-entropy alloy and ceramic nanoparticles in nanoseconds	PtAuPdCuCrSnFeCoNi	No	9	-4.9808	N/A	18.2677	1	N/A	5 ns	N/A	N/A	-10.336	N/A	N/A	N/A	0.0729	11	4.6	0.42	fcc	2022	45
		High-Entropy-Alloy Nanoparticles with Enhanced Interband Transitions for Efficient Photothermal Conversion	FeCoNiTiVCrCu	Yes	7	-3.9396	-12.7619	15.6388	4	N/A	5 min	N/A	N/A	-8.52411	N/A	-17.3464	N/A	0.0465	38.3	11	0.29	fcc, low crystallinity	2021	68
			FeCoNiTiVCr	Yes	6	-14.2984	-25.1022	14.3309	4	N/A		N/A	N/A	-18.4995	N/A	-29.3033	N/A	0.0562	32.1	8.8	0.27	fcc, low crystallinity
			FeCoNiTiVCu	Yes	6	2.3108	-5.5021	12.7401	4	N/A		N/A	N/A	-1.42396	N/A	-9.23686	N/A	0.0364	52.4	12	0.23	fcc, low crystallinity
			FeCoNiTiCrCu	Yes	6	-2.4792	-10.8805	14.5215	4	N/A		N/A	N/A	-6.73618	N/A	-15.1375	N/A	0.0442	34.5	10.7	0.31	fcc, low crystallinity
			FeCoNiVCrCu	Yes	6	-0.4612	-4.0452	14.4928	4	N/A		N/A	N/A	-4.70976	N/A	-8.29376	N/A	0.0205	54.4	15.4	0.28	fcc, low crystallinity
		Extreme mixing in nanoscale transition metal alloys	PtPdRhRuIrAuCuFeCoNiCrMnWMoSn	No	15	-5.5497	N/A	22.5147	1	1800	55 ms	30000	100000	-12.1499	-52.2261	N/A	N/A	0.0609	10	N/A	N/A	fcc	2021	38
			PtPdRuRhIrAuCu	No	7	1.7528	0.3188	16.1774	1	1800	55 ms	30000	100000	-2.9896	-31.7854	-4.4236	-33.2194	0.0337	N/A	N/A	N/A	fcc
		High-entropy-alloy nanoparticles with 21 ultra-mixed elements for efficient photothermal conversion	FeCoNiCrYTiVCuAlNbMoTaWZnCdPbBiAgInMnSn	Yes	21	-2.93	N/A	24.2812	4	N/A	5 min	N/A	N/A	-10.048	N/A	N/A	N/A	0.1136	62	21	0.34	bcc	2022	69
			FeCoNiCrYTiVCuAlNbMoTaWZnCdPbBi	Yes	17	-8.2437	N/A	21.7535	4	N/A	5 min	N/A	N/A	-14.6207	N/A	N/A	N/A	0.1039	82	14	0.17	bcc
		Quinary, Senary, and Septenary High Entropy Alloy Nanoparticle Catalysts from Core@Shell Nanoparticles and the Significance of Intraparticle Heterogeneity	PdCuPtNiCoRhIr	Yes	7	-2.2134	-3.4392	16.1337	2	600	10 h	20	N/A	-6.94299	-16.3005	-8.16879	-17.849	0.0433	10	N/A	N/A	fcc	2022	65
			PdCuPtNiCoRh	Yes	6	-1.4984	-2.7727	14.1397	2	600	10 h	20	N/A	-5.64345	-13.8445	-6.91775	-15.1188	0.0428	10	N/A	N/A	fcc
		A General Synthetic Method for High-Entropy Alloy Subnanometer Ribbons	PtPdIrRuAuRhOsAg	Yes	8	7.992	5.5379	16.9112	5	200	1 h	N/A	N/A	3.03448	-0.00953	0.58038	-2.46363	0.0264	1.5	N/A	N/A	fcc	2022	76
			PtPdIrRuAuRhAg	Yes	7	6.3992	3.0856	15.9391	5	200	1 h	N/A	N/A	1.72665	-1.14239	-1.58695	-4.45599	0.0269	1.5	N/A	N/A	fcc
			PtPdIrRuAuAg	Yes	6	6.4976	2.7632	14.7389	5	200	1 h	N/A	N/A	2.17689	-0.47611	-1.55751	-4.21051	0.0264	1.5	N/A	N/A	fcc
		Laser-generated high entropy metallic glass nanoparticles as bifunctional electrocatalysts	CrCoFeNiMnMo	Yes	6	-3.2816	-12.1363	14.4453	4	N/A	40 ns	10000000000	10000000000	-7.51624	N/A	-16.3709	N/A	0.0383	22	16	0.73	amorphous	2021	72
		Electrosynthesis of high-entropy metallic glass nanoparticles for designer, multi-functional electrocatalysis	CoCrCuGdInMnNiV	Yes	8	0.9026	N/A	17.1495	2	25	100 ms	N/A	N/A	-4.12478	-4.21052	N/A	N/A	0.1068	>100 nm	N/A	N/A	amorphous	2019	61
			CoCrCuGdMnNiV	Yes	7	-5.0865	N/A	16.0541	2	25	100 ms	N/A	N/A	-9.79276	-9.87303	N/A	N/A	0.0453	>100 nm	N/A	N/A	amorphous
			CoCrLaMnNiV	Yes	6	-8.3103	-12.2213	14.7417	2	25	100 ms	N/A	N/A	-12.6318	-12.7055	-16.5428	-16.6165	0.1572	>100 nm	N/A	N/A	amorphous
		Flash-Thermal Shock Synthesis of High-Entropy Alloys Toward High-Performance Water Splitting	PtIrFeNiCoCe	No	6	-23.8636	N/A	14.8966	1	1800	100 ms	90000	10000	-28.2306	-54.7465	N/A	N/A	0.1433	>10nm	N/A	N/A	fcc	2023	40
			PtIrFeCoNiPdCuRu	No	8	-2.3125	-4.8125	17.2885	1	1800	100 ms	90000	10000	-7.3806	-38.1541	-9.8806	-40.6541	0.0418	>10nm	N/A	N/A	fcc
			PtIrFeNiCoLaCeInSr	No	9	-23.901	N/A	18.2677	1	1800	100 ms	90000	10000	-29.2561	-61.7726	N/A	N/A	0.1997	>10nm	N/A	N/A	fcc
		Facile and General Method to Synthesize Pt-Based High-Entropy-Alloy Nanoparticles	PtCoCuRuFeNi	No	6	-1.8924	-5.0786	14.8966	3	850	10 h	3	2025-10-05	-6.2594	-18.6236	-5.0786	-21.8097	0.0397	2-13 nm	N/A	N/A	fcc	2022	66
			PtCoCuNiRuFeIr	Yes	7	-2.2095	-3.9822	16.1463	3	850	10 h	3	2025-10-05	-6.9428	-20.3443	-3.9822	-22.1169	0.0395	2-13 nm	N/A	N/A	fcc
			PtCoCuRuNiFeIrRhPdW	Yes	10	-3.2406	-8.6725	19.0172	3	850	10 h	3	2025-10-05	-8.81549	-24.5998	-14.2474	-30.0317	0.0425	2-13 nm	N/A	N/A	fcc
		Nanoporous high-entropy alloys for highly stable and efficient catalysts	AlNiCuPtPdAuCoFe	No	8	-11.375	-30.8351	17.2885	5	25	N/A	N/A	N/A	-16.4431	-16.5296	-35.9032	-35.9897	0.0572	N/A	N/A	N/A	fcc	2019	77
			AlNiCuPtPdAu	Yes	6	-17.5991	-40.1109	14.8966	5	25	N/A	N/A	N/A	-21.966	-22.0405	-44.4778	-44.5523	0.0529	N/A	N/A	N/A	fcc
			AlNiCuMoCoFe	No	6	-3.6773	-28.7801	14.8966	5	25	N/A	N/A	N/A	-8.04424	-8.11872	-33.147	-33.2215	0.0558	N/A	N/A	N/A	fcc
		The Micron-Droplet-Confined Continuous-Flow Synthesis of Freestanding High-Entropy-Alloy Nanoparticles by Flame Spray Pyrolysis	AuPtPdRuIrCoNi	No	7	3.1456	1.11	16.1774	1	1800	5 ms	400000	N/A	-1.5968	-30.3926	-3.6324	-32.4282	0.0493	>10nm	N/A	N/A	fcc	2024	44
		Rational design of septenary high-entropy alloy for direct ethanol fuel cells	PtPdFeCoNiSnMn	Yes	7	-16.5776	N/A	15.6559	2	160	10 h	5	N/A	-21.1671	-23.359	N/A	N/A	0.0779	N/A	N/A	N/A	fcc	2023	53
		Stable Multimetallic Nanoparticles for Oxygen Electrocatalysis	RuIrCeNiWCuCrCo	No	8	-8.0625	N/A	17.2885	1	1700	1 s	30000	100000	-13.1306	-42.1753	N/A	N/A	0.1287	2-3 nm	N/A	N/A	N/A	2019	39
		Atomically Dispersed Intrinsic Hollow Sites of M-M1-M (M1 = Pt, Ir; M = Fe, Co, Ni, Cu, Pt, Ir) on FeCoNiCuPtIr Nanocrystals Enabling Rapid Water Redox	FeCoNiCuPtIr	Yes	6	-1.311	-6.963	14.2381	1	1300	50 ms	46400	7400	-5.4849	-23.7097	-11.1369	-29.3617	0.0376	10.4	2.3	0.22	fcc, low crystallinity	2022	46
		Sputter Deposition of Multi-Element Nanoparticles as Electrocatalysts for Methanol Oxidation	PtFeCoNiCuAg	Yes	6	-4.8872	-11.9578	12.4273	4	25	1-10 min	N/A	N/A	-8.53026	-8.5924	-15.6009	-15.663	0.0517	5 – 52 nm	N/A	N/A	fcc	2008	73
		Convex Cube-Shaped Pt34Fe5Ni20Cu31Mo9Ru High Entropy Alloy Catalysts toward High-Performance Multifunctional Electrocatalysis	PtFeNiCuMoRu	Yes	6	-7.4192	-15.9815	12.1742	2	220	2h	N/A	N/A	-10.9881	-13.4229	-19.5504	-21.9852	0.0469	13.5	N/A	N/A	fcc, low crystallinity	2022	52
		A Library of Seed@High-Entropy-Alloy Core–shell Nanocrystals With Controlled Facets for Catalysis	PdPtIrRuRhOsAuCoFeNi	Yes	10	2.1359	0.5541	18.7377	2	200	20 h	N/A	N/A	-3.35706	-6.72984	-4.93886	-8.31164	0.0446	20	N/A	N/A	fcc	2024	56
		Alloying at the nanoscale	TiFeCoNiCrZr	No	6	-25.3767	-32.4067	14.8966	4	N/A	0.5 s	N/A	N/A	-29.7436	N/A	-36.7736	N/A	0.0981	200	N/A	N/A	N/A	2024	70
			PdCuNiPtRhIr	No	6	-2.5725	-4.4477	14.8966	4	N/A	0.5 s	N/A	N/A	-6.93944	N/A	-8.81464	N/A	0.0389	200	N/A	N/A	N/A
			PtRhTiFeCoNiZrCr	No	8	-33.8272	-41.6899	17.0079	4	N/A	0.5 s	N/A	N/A	-38.8131	N/A	-46.6758	N/A	0.0911	200	N/A	N/A	N/A
		Programmable Synthesis of High-Entropy Nanoalloys for Efficient Ethanol Oxidation Reaction	PdPtCuPbBiSb	Yes	6	-10.5458	N/A	13.9393	2	160	6 h	N/A	N/A	-14.6321	-16.5836	N/A	N/A	0.1118	34.8	N/A	N/A	fcc	2023	51
		NiFeCo-based high entropy alloys nanoparticles coated with N-doped graphene layers as hydrogen evolution catalyst in alkaline solution	CuNiFeCoCrTi	Yes	6	0.3248	-6.6129	14.1804	4	N/A	15 min	N/A	N/A	-3.83218	N/A	-10.7699	N/A	0.0418	5-20 nm	N/A	N/A	fcc	2024	71
		Continuous synthesis of metal oxide-supported high-entropy alloy nanoparticles with remarkable durability and catalytic activity in the hydrogen reduction reaction	CuAgNiFeCoRuMn	Yes	7	5.1928	5.1978	15.7525	1	2700	60 s	N/A	N/A	0.574955	-41.6417	0.57995	-41.6367	0.0481	2-5 nm	N/A	N/A	fcc	2024	47
		Application of platinum-based high-entropy-alloy nanoparticles for electro-oxidation of formic acid and glycerol	FeCoNiCuMnPt	Yes	6	-10.656	-16.8158	10.2282	2	200	20h	N/A	N/A	-13.6544	-15.4955	-19.8142	-21.6553	0.0452	200	N/A	N/A	fcc	2024	49
		Strong transboundary electron transfer of high-entropy quantum-dots driving rapid hydrogen evolution kinetics	PtRuMoFeCoNi	Yes	6	-13.0408	-22.0287	14.3221	3	230	80 s	N/A	N/A	-17.2393	-20.247	-26.2272	-29.2349	0.045	1.92	1	0.52	fcc, low crystallinity	2024	80
		Laser Precise Synthesis of Oxidation-Free High-Entropy Alloy Nanoparticle Libraries	PdPtOsIrRuFeCoNi	Yes	8	-2.4479	-3.9767	17.1484	1	1500	14 us	77100000	700000	-7.47495	-32.8546	-9.00375	-34.3834	0.0418	10 nm	N/A	N/A	N/A	2024	79
		High-Entropy Alloy Array via Liquid Metal Nanoreactor	GaPtFeCoNiCuRuIr	No	8	-8.0625	N/A	17.2885	3	800	10 h	N/A	N/A	-13.1306	-26.6157	N/A	N/A	0.0456	>100 nm	N/A	N/A	N/A	2024	64
			GaPtFeCoNiCuCrMnPdRhRu	No	11	-11.3517	N/A	19.9361	3	800	10 h	N/A	N/A	-17.196	-32.7461	N/A	N/A	0.0439	>100 nm	N/A	N/A	N/A
		Lattice distortion and elemental synergy in platinum-based high-entropy alloy boosts liquid fuels electrooxidation	PtRhNiCoFeGaW	Yes	7	-11.6947	N/A	15.8168	2	220	3h	N/A	N/A	-16.3314	-19.4948	N/A	N/A	0.0513	16.8	1.2	0.07	fcc	2024	55
		Twelve-Component Free-Standing Nanoporous High-Entropy Alloys for Multifunctional Electrocatalysis	MnNiCuCoVFeCrMoPdPtAuAgRuIrRhOs	Yes	16	-8.5448	-13.6703	20.5394	5	50	10h	N/A	N/A	-14.5659	-15.1821	-19.6914	-20.3076	0.0519	N/A	N/A	N/A	fcc, low crystallinity	2021	78
			MnNiCuCoVFeMoPdPtAuRuIr	Yes	12	-6.2069	-14.8339	18.576	5	50	10h	N/A	N/A	-11.6525	-12.2097	-20.2795	-20.8367	0.0462	N/A	N/A	N/A	fcc, low crystallinity
		A fine 3d transition metal regulation strategy toward high-entropy alloy mesoporous nanotubes as efficient electrocatalysts	PtPdRhRuIrMnCu	No	7	-8.0881	-9.4005	16.1783	2	180	6h	N/A	N/A	-12.8308	-15.4193	-14.1432	-16.7317	0.0341	N/A	N/A	N/A	fcc	2023	57
			PtPdRuIrCoCu	Yes	6	-3.3904	-6.788	14.173	2	180	6h	N/A	N/A	-7.54521	-9.81289	-10.9428	-13.2105	0.0367	N/A	N/A	N/A	fcc
		Thermal stability and phase separation of nanoporous high-entropy alloys containing 23 elements	AlAgAuCoCrCuFeHfIrMnMoNbNiPdPtReRhRuTaTiVWZr	Yes	23	-29.8016	-49.4591	25.6239	5	20	3h	N/A	N/A	-37.3132	-37.3132	-56.9707	-56.9708	0.0693	N/A	N/A	N/A	fcc, low crystallinity	2023	75
			AlCoCrCuFeHfMnMoNbNiTaTiVWZr	Yes	15	-18.049	-41.2231	21.6194	5	20	3h	N/A	N/A	-24.3867	-24.3867	-47.5608	-47.5608	0.0863	N/A	N/A	N/A	fcc, low crystallinity
			AlAgAuCoCuFeIrMoNiPdPtRhRuTi	Yes	14	-21.5771	-49.3427	21.0186	5	20	3h	N/A	N/A	-27.7387	-27.7387	-55.5043	-55.5043	0.0527	N/A	N/A	N/A	fcc, low crystallinity
		A general approach to high-entropy metallic nanowire electrocatalysts	PtMoRhIrRuCoFeNiMnCr	Yes	10	-13.7648	-19.7442	17.8148	2	220	1.5h	N/A	N/A	-18.9872	-22.5502	-24.9666	-28.5296	0.0393	N/A	N/A	N/A	fcc	2023	58
			PtRhMoIrCoRuFeNiMn	Yes	9	-13.9888	-21.1477	16.7244	2	220	1.5h	N/A	N/A	-18.8916	-22.2364	-26.0505	-29.3953	0.037	N/A	N/A	N/A	fcc
			PtRhMoIrCoRuFeNi	Yes	8	-11.8724	-18.4135	16.3463	2	220	1.5h	N/A	N/A	-16.6643	-19.9336	-23.2054	-26.4747	0.0368	N/A	N/A	N/A	fcc
			PtRhMoIrCoRuFe	Yes	7	-9.504	-14.2266	15.5969	2	220	1.5h	N/A	N/A	-14.0762	-17.1956	-18.7988	-21.9182	0.0336	N/A	N/A	N/A	fcc
			PtRhMoIrCoRu	Yes	6	-10.8968	-14.7748	14.3977	2	220	1.5h	N/A	N/A	-15.1175	-17.997	-18.9955	-21.875	0.0272	N/A	N/A	N/A	fcc
		Facile Solvothermal Synthesis of Pt–Ir–Pd–Rh–Ru–Cu–Ni–Co High-Entropy Alloy Nanoparticles	PtIrPdRhRuCuNiCo	Yes	8	-1.1875	-1.9901	17.2885	2	200	20h	N/A	N/A	-6.25562	-9.36755	-7.05822	-10.1701	0.0401	2.55	N/A	N/A	fcc	2022	50
		Stably Immobilizing Sub-3 nm High-Entropy Pt Alloy Nanocrystals in Porous Carbon as Durable Oxygen Reduction Electrocatalyst	PtRuIrRhFeCoNiCuZnSn	No	10	-5.56	N/A	19.1437	3	700	14h	N/A	N/A	-11.172	-24.1897	N/A	N/A	0.0641	2.8	N/A	N/A	fcc	2022	67
			PtRuIrFeCoNiCuZn	No	8	-5.5	-11.9288	17.2885	3	700	14h	N/A	N/A	-10.5681	-22.3243	-16.9969	-28.7531	0.043	2.9	N/A	N/A	fcc
			PtRuIrFeCoNiCu	No	7	-2.5196	-4.5739	16.1774	3	700	14h	N/A	N/A	-7.262	-18.2626	-9.3163	-20.3169	0.0402	2.6	N/A	N/A	fcc
			PtFeCoNiCuZn	Yes	6	-8.9174	-20.8761	13.4219	3	700	14h	N/A	N/A	-12.852	-21.9789	-24.8107	-33.9376	0.0468	2.2	N/A	N/A	fcc
		Molten salt synthesis of high-entropy alloy AlCoCrFeNiV nanoparticles for the catalytic hydrogenation of p-nitrophenol by NaBH4	AlCoCrFeNiV	Yes	6	-15.1576	-30.9707	14.7196	2	500	20h	N/A	N/A	-19.4727	-26.5381	-35.2858	-42.3512	0.0498	15	N/A	N/A	bcc	2022	59
			AlCoCrFeNiV	Yes	6	-15.1576	-30.9707	14.7196	2	700	20h	N/A	N/A	-19.4727	-29.482	-35.2858	-45.2951	0.0498	15	N/A	N/A	fcc
		Ambient Synthesis of Pt-Reactive Metal Alloy and High-Entropy Alloy Nanocatalysts Utilizing Hydrogen Cold Plasma	PtCrTaVFeAl	Yes	6	-38.8724	-82.432	14.2674	2	200	10 min	N/A	N/A	-43.0549	-45.623	-86.6145	-89.1826	0.0528	7.5	2.4	0.32	fcc	2021	62
		Continuous Synthesis of Hollow High-Entropy Nanoparticles for Energy and Catalysis Applications	CrMnFeCoNiPdRuIr	No	8	-9.1875	-10.5538	17.2885	1	1080	1 s	1080	N/A	-14.2556	-32.5814	-15.6219	-33.9477	0.0388	>100 nm	N/A	N/A	fcc, low crystallinity	2020	43
		High-throughput, combinatorial synthesis of multimetallic nanoclusters	PtPdRhRuIrFeCoNi	No	8	-2.9375	-4.8789	17.2885	1	1377	500 ms	30000	100000	-8.00562	-31.4661	-9.94702	-33.4075	0.041	3.7	1	0.27	fcc	2020	37
		All Iron-Group and Platinum-Group Elements Metal High-Entropy Alloy Nanoparticles	FeCoNiRuRhPdOsIrPt	No, given	9	-2.0322	-3.2318	18.2677	2	340	1 h	N/A	N/A	-7.3874	-13.23	-8.587	-14.4326	0.0391	9.3	1.3	0.14	fcc	2025	54
